# Supplementary material for: Field assessments on the impact of CO 2 concentration fluctuations along with complex-terrain flows on the estimation of the net ecosystem exchange of temperate forests
Source: Copernicus journal article supplement (doi:10.5194/amt-17-5581-2024), 2024-09-25
Supplement: Supplementary file 1 [file amt-17-5581-2024-supplement.zip]

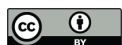

## *Supplement of*

# **Field assessments on the impact of CO<sub>2</sub> concentration fluctuations along with complex-terrain flows on the estimation of the net ecosystem exchange of temperate forests**

**Dexiong Teng et al.**

*Correspondence to:* Jiaojun Zhu ([jiaojunzhu@iae.ac.cn](mailto:jiaojunzhu@iae.ac.cn))

- [amt-17-5581-2024-supplement-title-page.pdf](#)
- Supplement
  - [Figure S1.jpg](#)
  - [Figure S2.jpg](#)
  - [Figure S3.png](#)
  - [Figure.pdf](#)
  - [Table S1.xlsx](#)
  - [Table S2.xlsx](#)
  - [Table S3.xlsx](#)
  - [Table S4.xlsx](#)
  - [Table S5.xlsx](#)
  - [Table S6.xlsx](#)
  - [Table S7.xlsx](#)
  - [Table S8.xlsx](#)

The copyright of individual parts of the supplement might differ from the article licence.
