# Supplementary material for: Field assessments on the impact of CO 2 concentration fluctuations along with complex-terrain flows on the estimation of the net ecosystem exchange of temperate forests
Source: Copernicus journal article supplement (doi:10.5194/amt-17-5581-2024), 2024-09-25
Supplement: Supplementary file 2 [file amt-17-5581-2024-supplement.zip]

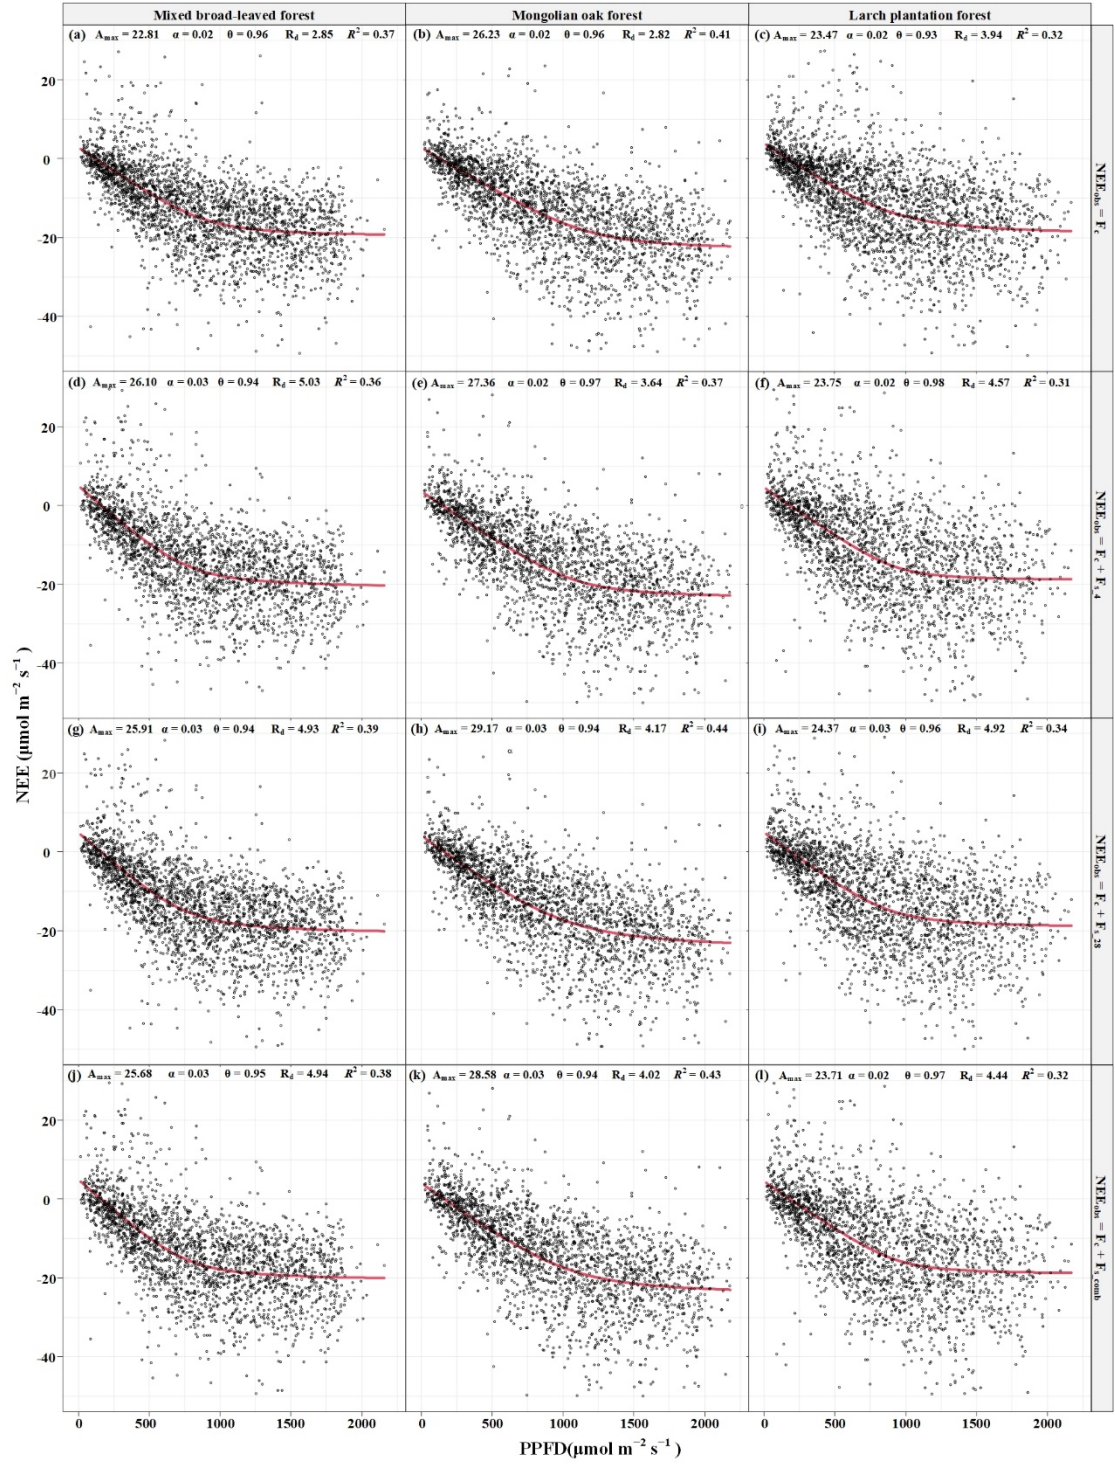

Figure S1 Response of daytime NEE observations ( $NEE_{obs}$ ) to photosynthetic photon flux density (PPFD) during July and August

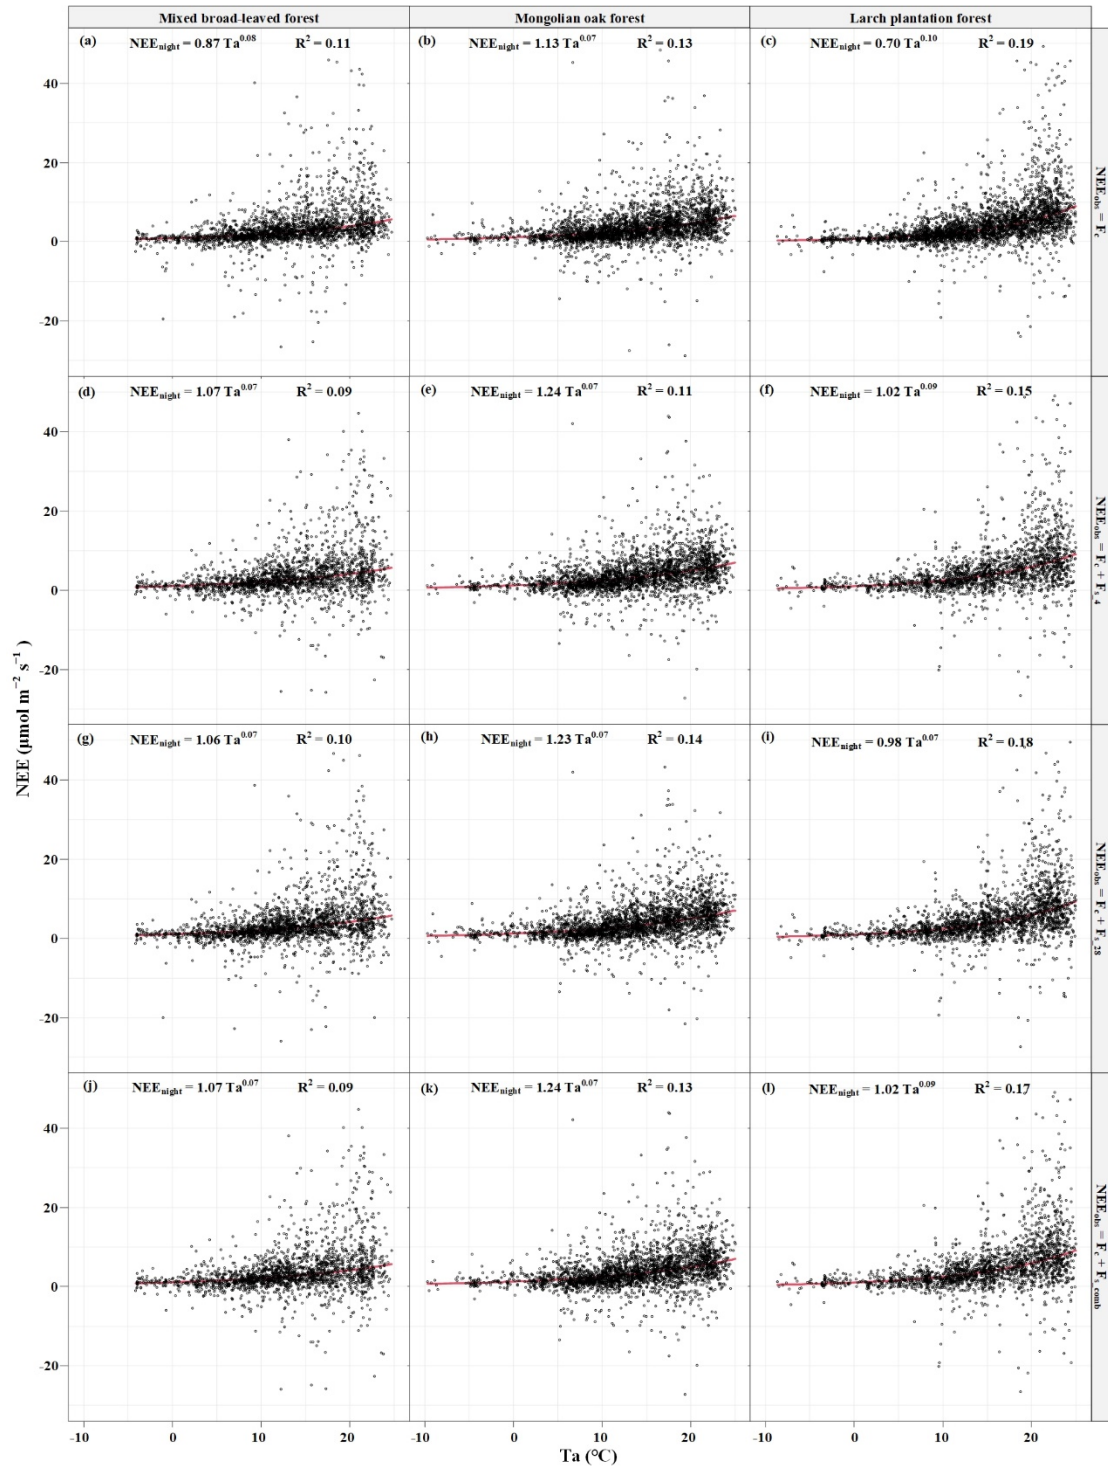

Figure S2 Response of nighttime NEE observations ( $NEE_{obs}$ ) to air temperature ( $Ta$ ) during the growing season

The influences of  $F_s$  on the relationship between NEE observations and meteorological drivers, indicated the effect of uncertainty in  $F_s$  estimates on NEE observations. Our analysis showed that the correlations between NEE observations

derived from  $F_c + F_s$  and both photosynthetic photon flux density (PPFD) and air temperature are lower compared to those obtained from  $F_c$  alone (Figure 1 and Figure 2 in the Supplementary Materials). Additionally, the estimated light saturated net  $\text{CO}_2$  assimilation ( $A_{\max}$ ) is greater when NEE observations are estimated by  $F_s + F_c$ , as opposed to when NEE is estimated solely by  $F_c$ . This suggests that  $F_s$  significantly affects daytime NEE and can correct the estimation of  $A_{\max}$  and related parameters. The relationship between NEE observations and PPFD is influenced by the size of averaging time window the  $F_s$  measurement. A larger averaging window results in less random uncertainty in the  $F_s$  estimation, thereby increasing the correlation between NEE observations and meteorological drivers, including PPFD and  $T_a$ .

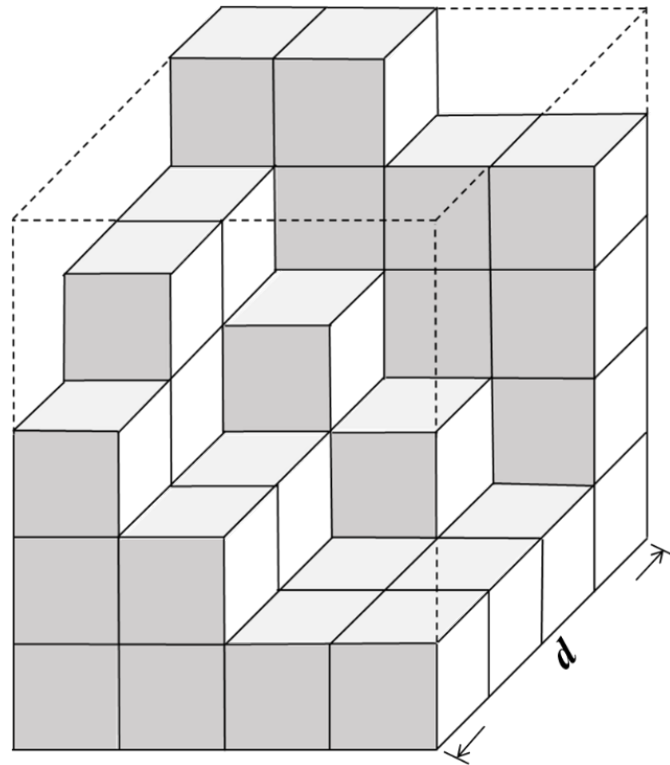

Figure S3 Calculation the volume of terrain above the lowest elevation of an area unit ( $V_u$ ) and its largest vertically projected area ( $S_v$ ) utilizing 3-dimensional box counting.  $d$  is the edge length of the side of the area unit;  $V_u$  represents the cumulative volumes of the constituent cubes; and  $S_v$  indicates the total area of the shaded regions.  $P_d$  is calculated by the ratio of  $V_u$  to the product of  $S_v$  and  $d$ .
